# Supplementary material
Source: PubMed Central journal article supplement (PMC4369435)
Supplement: NIHMS658518-supplement-1.pdf [file NIHMS658518-supplement-1.pdf]

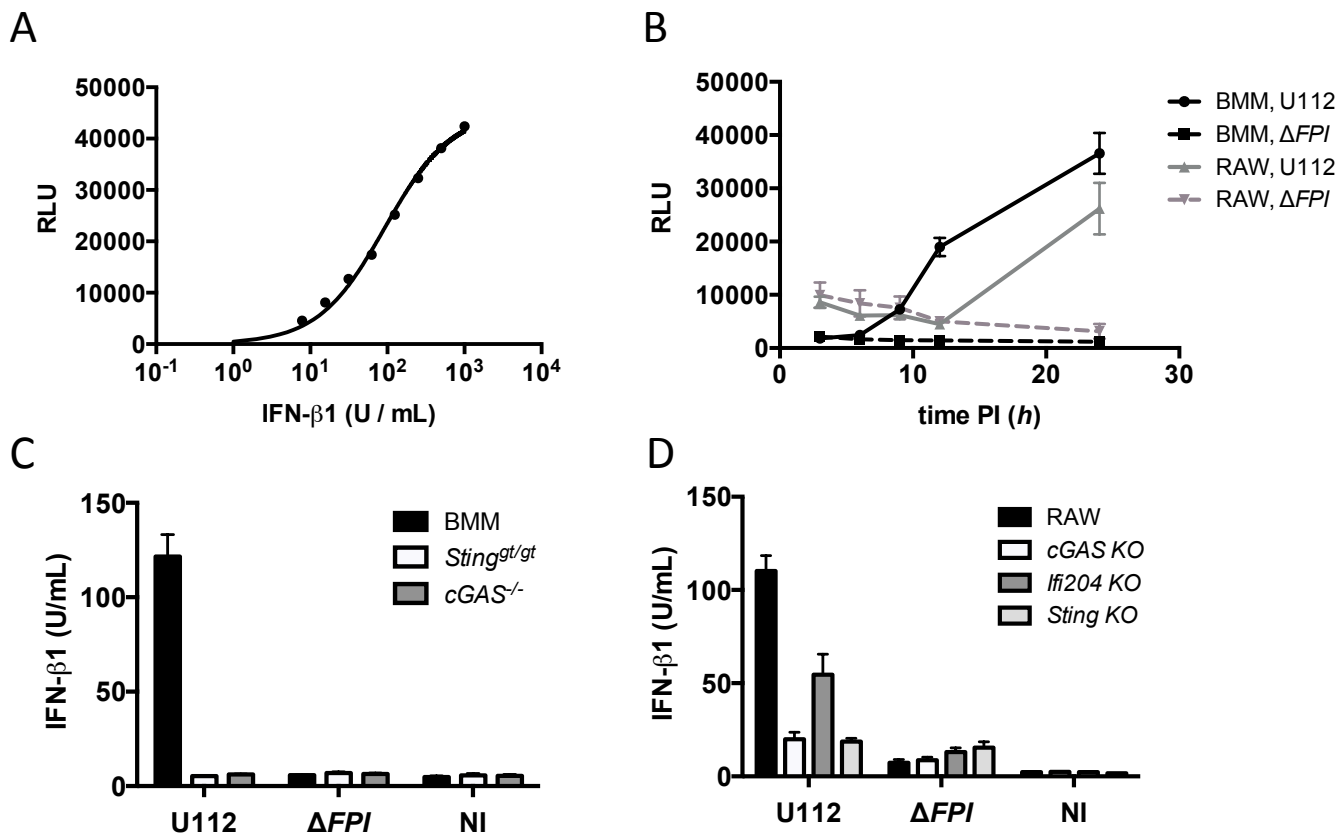

**Figure S1. Type I IFN response profiles in primary and immortalized macrophages.** (A) A standard curve for the L929-ISRE reporter assay using purified IFN-β is shown. (B) Type I IFN levels were measured from C57Bl/6 BMMs and RAW264.7 macrophages infected with indicated *F. novicida* strains at an MOI 10 and monitored overtime. Macrophages were infected with the indicated *F. novicida* strain at an MOI 10. Type I IFN activity was measured from C57Bl/6 BMM 12 h post-infection (C) or from RAW264.7 macrophages 24 h post-infection (D). Graphs show the mean ± standard deviation (SD) of triplicate wells and are representative of three independent experiments.

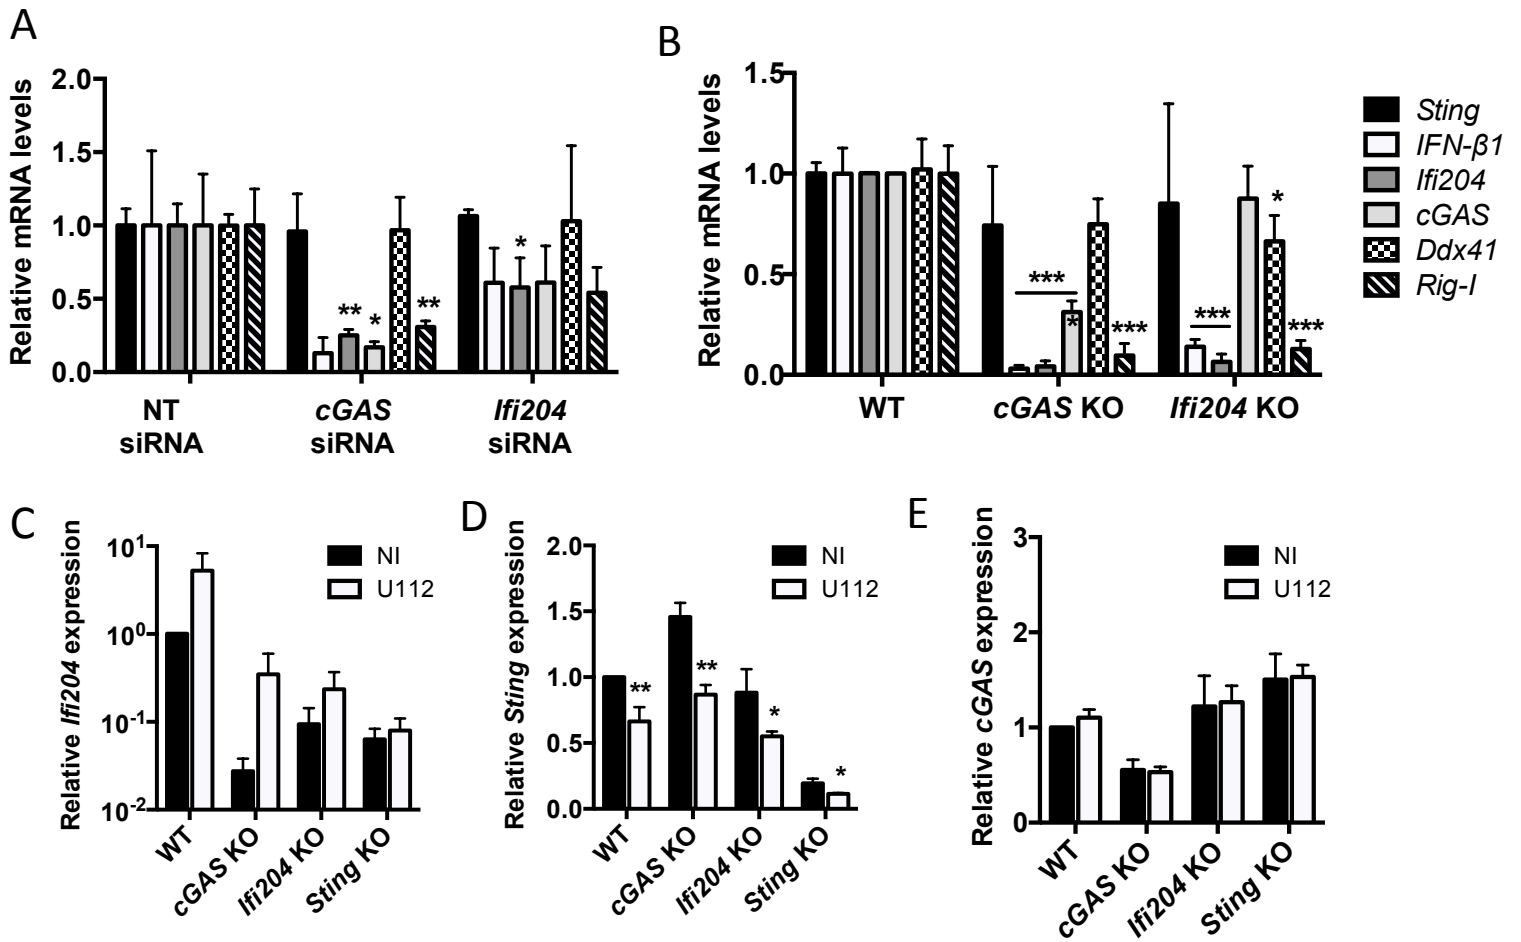

**Figure S2. mRNA expression profiles of uninfected and *F. novicida*-infected RAW264.7 mutant cell lines.** mRNA expression levels for the indicated gene were measured by qRT-PCR from uninfected C57Bl/6 BMMs (A) transfected with siRNA for 36 h or (B) uninfected RAW264.7 (WT) macrophage cell lines. mRNA expression levels of (C) *Iff204*, (D) *Sting* (E), and *cGAS* were measured from uninfected and U112 infected macrophage cell lines at an MOI 10 for 8 h. mRNA levels were normalized to GAPDH and either the NT control in BMMs or WT RAW264.7 macrophages. \* $p < 0.05$ , \*\* $p < 0.01$ , \*\*\* $p < 0.001$ . Graphs show the mean  $\pm$  standard deviation (SD) of three independent wells.

**Table S1. Primers used for this study.**

qRT-PCR primers (5'-3')

|                  |                           |
|------------------|---------------------------|
| Gapdh F          | ACTTTGTGAAGCTCATTTCCTGGTA |
| Gapdh R          | GTGGTTTGAGGGCTCTTACTCCTT  |
| Ifi204 F         | GGAAAGAGACAACCAAGAGC      |
| Ifi294 R         | TGGCTTGTAGTTGATGTAGG      |
| Sting F          | CCTAGCCTCGCACGAACTTG      |
| Sting R          | CGCACAGCCTTCCAGTAGC       |
| IFN- $\beta$ 1 F | CTGGAGCAGCTGAATGGAAAG     |
| IFN- $\beta$ 1 R | CTTGAAGTCCGCCCTGTAGGT     |
| Ddx41 F          | CCTACCATTCTGTCCGGTCCG     |
| Ddx41 R          | CTCTCGCTTGGAGAAAGGCA      |
| Lrrfip1 F        | CTGAGAACCCTCTGCCTGTG      |
| Lrrfip1 R        | GTTGCCGAAGTGAAGTGCAG      |
| RIG-I F          | TGCAAAGCGCTCTTCCTGTA      |
| RIG-I R          | GTAAGCTCTCGCTCGGTCTC      |
| cGAS F           | AGTCGTAAGGGGACCTAGCC      |
| cGAS R           | ACTCCCGTTTCTGCATTCTG      |
| TNF $\alpha$ F   | GATCGGTCCCAAAGGGATG       |
| TNF $\alpha$ R   | TGGTTTGTGAGTGTGAGGGTC     |

Cloning primers (5'-3')

|                     |                                                                   |
|---------------------|-------------------------------------------------------------------|
| cGAS Kozak XhoI F   | TTTCTCGAGACCATGGAAGATCCGCGTAGAAGG                                 |
| cGAS FLAG Sall R    | TTTGTCTGACTCACTTATCGTCGTCATCCTTGTAATCAAGCTTGTCAAAAATT<br>GGAAACCC |
| Ifi204 Kozak XhoI F | TTTCTCGAGACCATGGTGAATGAATACAAGAGAATTG                             |
| Ifi204 6xHIS Sall R | TTTGTCTGACTCAGTGGTGTGATGATGCTTTCTAGCATTGATGACCTG                  |

Sequencing primers (5'-3')

|              |                       |
|--------------|-----------------------|
| cGAS seq F   | CTCTGCTGGTCCCCACTGGTG |
| cGAS seq R   | CCGGATCCAGGATGGCCTGC  |
| Ifi204 seq F | CACCTCTTCTGCTTTTACCTG |
| Ifi204 seq R | CTGTCTGTCTGTCCCACCTTC |
| Sting seq F  | GTCAGTTCTAGATTGAGTGGG |
| Sting seq R  | GGTAAGGTTTAATGAAGTGG  |

**Table S2. Construction of targeted mutations in RAW264.7 macrophages**

| Gene Target | Target Sequence for CRISPR/Cas9 mutations | Clone Number | Nature of mutation(s)      |
|-------------|-------------------------------------------|--------------|----------------------------|
| cGAS        | GTCGGGGCGCGCTTCGCGGA                      | 1            | c119del; c122_123del       |
|             |                                           | 2            | c303_310del; c304_313del   |
| Ifi204      | GACAATCAGACGAGCCGAAG                      | 1            | g14389_14396del            |
|             |                                           | 2            | g14387_14393del; g14393del |
| Sting       | AGCAAAACATCGACCGTGC                       | 1            | c940del                    |
|             |                                           | 2            | c939_940del; c941_942del   |
